# Supplementary material
Source: HighWire-hosted journal article supplement (https://erj.ersjournals.com/highwire/filestream/114701/field_highwire_adjunct_files/0/ERJ-01857-2014_Online_Tables.pdf)
Supplement: ERJ-01857-2014_Online_Tables.pdf [file ERJ-01857-2014_Online_Tables.pdf]

**eTable 1. Association between asthma (restrictive definition) and CD (any age after the age of 1)**

|                | CD absent           | CD present                   | Total             |
|----------------|---------------------|------------------------------|-------------------|
| Asthma absent  | 118,782<br>(99.57%) | 518<br>(0.43%)               | 119,300<br>(100%) |
| Asthma present | 27,685<br>(99.23%)  | <b>214</b><br><b>(0.77%)</b> | 27,899<br>(100%)  |
| Total          | 146,467<br>(99.50%) | 732<br>(0.50%)               | 147,199<br>(100%) |

*p*-value for Pearson Chi square <0.001

CD: coeliac disease

**eTable 2. Risk factors of CD according to asthma (restrictive definition) and antibiotic exposure for asthma occurring at any time and preceding CD**

| Risk factor                                           | CD cases<br>(n=732)              | Person-years<br>(n= 1,197,873)              | Crude IRR<br>(95% CI)              | Adjusted IRR<br>(95% CI)*              |
|-------------------------------------------------------|----------------------------------|---------------------------------------------|------------------------------------|----------------------------------------|
| Asthma (at any time)                                  |                                  |                                             |                                    |                                        |
| No                                                    | 518                              | 912,472                                     | 1                                  | 1                                      |
| Yes                                                   | 214                              | 285,402                                     | <b>1.48</b> (1.26-1.74)            | <b>1.45</b> (1.24-1.71)                |
| Any antibiotic in the first year of life              |                                  |                                             |                                    |                                        |
| No                                                    | 411                              | 712,481                                     | 1                                  | 1                                      |
| Yes                                                   | 321                              | 485,392                                     | <b>1.19</b> (1.03-1.38)            | <b>1.16</b> (1.00-1.38)                |
|                                                       | CD cases <sup>^</sup><br>(n=660) | Person-years <sup>^</sup><br>(n= 1,197,712) | Crude IRR <sup>^</sup><br>(95% CI) | Adjusted IRR <sup>^</sup><br>(95% CI)* |
| Asthma (preceding CD) <sup>^</sup>                    |                                  |                                             |                                    |                                        |
| No                                                    | 518                              | 912,472                                     | 1                                  | 1                                      |
| Yes                                                   | 142                              | 285,240                                     | 0.97 (0.80-1.17)                   | 0.95 (0.79-1.15)                       |
| Any antibiotic in the first year of life <sup>^</sup> |                                  |                                             |                                    |                                        |
| No                                                    | 378                              | 712,397                                     | 1                                  | 1                                      |
| Yes                                                   | 282                              | 485,315                                     | 1.14 (0.98-1.32)                   | 1.14 (0.98-1.33)                       |

Poisson regression models adjusted for sex and year of birth

\*mutually adjusted for either asthma or antibiotic exposure

<sup>^</sup>excluding 72 asthma cases with CD diagnosis before asthma

CD: coeliac disease; CI: confidence interval; IRR: incident rate ratio

**eTable 3. Risk factors of CD according to asthma (restrictive definition) and antibiotic exposure. Analysis stratified by age at CD identification for asthma occurring at any time and preceding CD**

|                                           | CD identified at 1-3 years of age (n=200)  |                            | CD identified at (3-5] years of age (n=183) |                            | CD identified at >5 years of age (n=349)  |                            |
|-------------------------------------------|--------------------------------------------|----------------------------|---------------------------------------------|----------------------------|-------------------------------------------|----------------------------|
| RISK FACTOR                               | Crude IRR (95% CI)                         | adjusted* IRR (95% CI)     | Crude IRR (95% CI)                          | adjusted* IRR (95% CI)     | Crude IRR (95% CI)                        | adjusted* IRR (95% CI)     |
| Asthma (at any time)                      | <b>1.51</b><br>(1.10-2.09)                 | <b>1.44</b><br>(1.04-1.99) | <b>1.47</b><br>(1.06-2.05)                  | <b>1.47</b><br>(1.05-2.04) | <b>1.46</b><br>(1.16-1.83)                | <b>1.45</b><br>(1.16-1.83) |
| Any antibiotic in the first year of life  | <b>1.58</b><br>(1.20-2.09)                 | <b>1.54</b><br>(1.16-2.03) | 1.06<br>(0.79-1.43)                         | 1.03<br>(0.76-1.38)        | 1.07<br>(0.87-1.33)                       | 1.04<br>(0.84-1.29)        |
|                                           | CD identified at 1-3 years of age (n=162)^ |                            | CD identified at 4-5 years of age (n=159)^  |                            | CD identified at >5 years of age (n=339)^ |                            |
|                                           | Crude IRR (95% CI)                         | adjusted* IRR (95% CI)     | Crude IRR (95% CI)                          | adjusted* IRR (95% CI)     | Crude IRR (95% CI)                        | adjusted* IRR (95% CI)     |
| Asthma (before CD diagnosis)^             | <b>0.40</b><br>(0.23-0.70)                 | <b>0.38</b><br>(0.22-0.66) | 0.76<br>(0.50-1.17)                         | 0.76<br>(0.50-1.17)        | <b>1.33</b><br>(1.05-1.68)                | <b>1.33</b><br>(1.05-1.68) |
| Any antibiotic in the first year of life^ | <b>1.52</b><br>(1.11-2.06)                 | <b>1.59</b><br>(1.17-2.17) | 0.98<br>(0.71-1.34)                         | 1.00<br>(0.72-1.37)        | 1.06<br>(0.86-1.32)                       | 1.04<br>(0.84-1.68)        |

*Poisson regression models adjusted for sex and year of birth*

*\*mutually adjusted for either asthma or antibiotic exposure*

*^ excluding 72 asthma cases with CD diagnosis before asthma*

*CD: coeliac disease; CI: confidence interval; IRR: incident rate ratio*
